# Supplementary material
Source: publisher figshare collection journal article supplement (https://sage.figshare.com/ndownloader/files/22068048)
Supplement: Supplementary file 1 [file 22068048]

**Composition and Analysis of the kitten's diets (AVA Veterinary Approved kitten dry food, Felix kitten pouch and Whiskas kitten pouch) as stated by the manufacturers**

**Diet composition**

AVA Veterinary Approved kitten dry food:

Chicken (66%) (chicken meal 30.2%, fresh chicken 26%, chicken fat 6.4%, chicken gravy 3.3%), tapioca starch (12.23%), potato flakes (10.4%), whole egg powder (6.18%), brewer's yeast, DHA-algae (1.23%), pea fibre, minerals, potassium chloride (0.16%), beta-glucans, cranberry extract, pomegranate Extract, green tea extract, rosemary extract, natural antioxidant, glucosamine (100mg/kg) and chondroitin (50mg/kg).

Felix Kitten Pouch:

Meat and animal derivatives (of which chicken 4% / cod 4% / lamb 4% / plaice 4%), fish and fish derivatives, minerals and various sugar.

Whiskas Kitten Pouch:

Meat and animal derivatives (25% including 4% chicken / 4% duck / 4% poultry / 4% turkey), vegetable protein extracts, minerals (0.96%) and various sugars.

**Diet Analysis (on an as fed basis)**

|                          |                        | AVA Veterinary<br>Approved kitten dry<br>food | Felix Kitten<br>Pouch | Whiskas Kitten<br>Pouch |
|--------------------------|------------------------|-----------------------------------------------|-----------------------|-------------------------|
| Typical<br>Values        | Moisture               | 10%                                           | 82%                   | 81%                     |
|                          | Protein                | 38%                                           | 10%                   | 13.5%                   |
|                          | Fat content            | 20%                                           | 5%                    | 3%                      |
|                          | Crude ash              | 8%                                            | 2.5%                  | 1.2%                    |
|                          | Crude fibres           | 2.2%                                          | 0.5%                  | 0.33%                   |
|                          | Energy density         | 4020.6Kcal/kg                                 | 829.3Kcal/kg          | 850.2Kcal/kg            |
| Nutritional<br>additives | Vitamin A              | 24750 IU/kg                                   | 1540 IU/kg            | Not stated              |
|                          | Vitamin B <sub>1</sub> | Not stated                                    | Not stated            | 29.4mg/kg               |
|                          | Vitamin D <sub>3</sub> | 1350 IU/kg                                    | 240 IU/kg             | 260 IU/kg               |
|                          | Vitamin E              | 450 IU/kg                                     | Not stated            | Not stated              |
|                          | Iron                   | Not stated                                    | 10.5mg/kg             | 17.6mg/kg               |
|                          | Iodine                 | 2mg/kg                                        | 0.3mg/kg              | 0.35mg/kg               |
|                          | Calcium                | 1.53g/100g                                    | 0.18g/100g            | 0.2g/100g               |
|                          | Copper                 | 64mg/kg                                       | 0.9mg/kg              | 1.5mg/kg                |

|  |           |           |            |            |
|--|-----------|-----------|------------|------------|
|  | Manganese | 40mg/kg   | 2.1mg/kg   | 3.5mg/kg   |
|  | Selenium  | 70mg/kg   | Not stated | Not stated |
|  | Taurine   | 1350mg/kg | Not stated | Not stated |
|  | Zinc      | 500mg/kg  | 10.5mg/kg  | 28.2mg/kg  |

### Diet Analysis (on a dry matter basis)

|                          |                        | AVA Veterinary<br>Approved kitten dry<br>food | Felix Kitten<br>Pouch | Whiskas Kitten<br>Pouch |
|--------------------------|------------------------|-----------------------------------------------|-----------------------|-------------------------|
| Typical<br>Values        | Dry Matter             | 90%                                           | 18%                   | 19%                     |
|                          | Protein                | 42.2%                                         | 55.5%                 | 71%                     |
|                          | Fat content            | 22.2%                                         | 27.7%                 | 15.8%                   |
|                          | Crude ash              | 8.88%                                         | 13.8%                 | 6.3%                    |
|                          | Crude fibres           | 2.44%                                         | 2.7%                  | 1.7%                    |
| Nutritional<br>additives | Vitamin A              | 27500 IU/kg                                   | 8555 IU/kg            | Not stated              |
|                          | Vitamin B <sub>1</sub> | Not stated                                    | Not stated            | 154.7mg/kg              |
|                          | Vitamin D <sub>3</sub> | 1500 IU/kg                                    | 1333.3 IU/kg          | 1368.4 IU/kg            |
|                          | Vitamin E              | 500 IU/kg                                     | Not stated            | Not stated              |
|                          | Iron                   | Not stated                                    | 58.3mg/kg             | 92.6mg/kg               |
|                          | Iodine                 | 2.22mg/kg                                     | 1.66mg/kg             | 1.84mg/kg               |
|                          | Calcium                | 1.7g/100g                                     | 1.0g/100g             | 1.0g/100g               |
|                          | Copper                 | 71.1mg/kg                                     | 5mg/kg                | 7.89mg/kg               |
|                          | Manganese              | 44.4mg/kg                                     | 11.66mg/kg            | 18.4mg/kg               |
|                          | Selenium               | 77.7mg/kg                                     | Not stated            | Not stated              |
|                          | Taurine                | 1500mg/kg                                     | Not stated            | Not stated              |
|                          | Zinc                   | 555.5mg/kg                                    | 58.3mg/kg             | 148mg/kg                |

### The European Pet Food Industry Federation (FEDIAF) Recommendation

|                        | Kitten diet overall   | FEDIAF standards for growing kitten         | FEDIAF standards for growing kitten                                                                                       |
|------------------------|-----------------------|---------------------------------------------|---------------------------------------------------------------------------------------------------------------------------|
| Calcium                | 1.2g/100g dry matter  | 2.5g / 1000Kcal of Metabolisable Energy     | 1g/100g dry matter                                                                                                        |
| Vitamin D <sub>3</sub> | 140IU/100g dry matter | MINIMUM 70 IU/1000Kcal Metabolisable Energy | MINIMUM 28IU/100g dry matter<br>MAXIMUM 227IU/100g dry matter (legal limit)<br>3000IU/100g dry matter (nutritional limit) |
